# Supplementary material for: Effects of diamine isomers on the properties of colorless and transparent copoly(amide imide)s
Source: Royal Society of Chemistry journal article supplement (doi:10.1039/d1ra03999g), 2021-01-01

### FT-IR of *m*-PMAB monomer

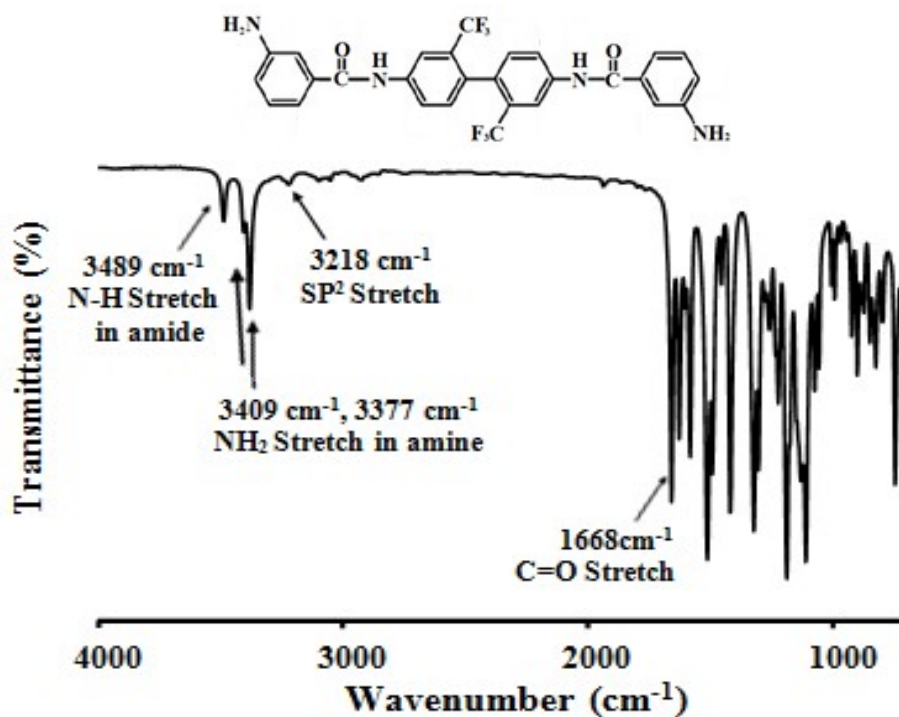

### FT-IR of *p*-PMAB monomer

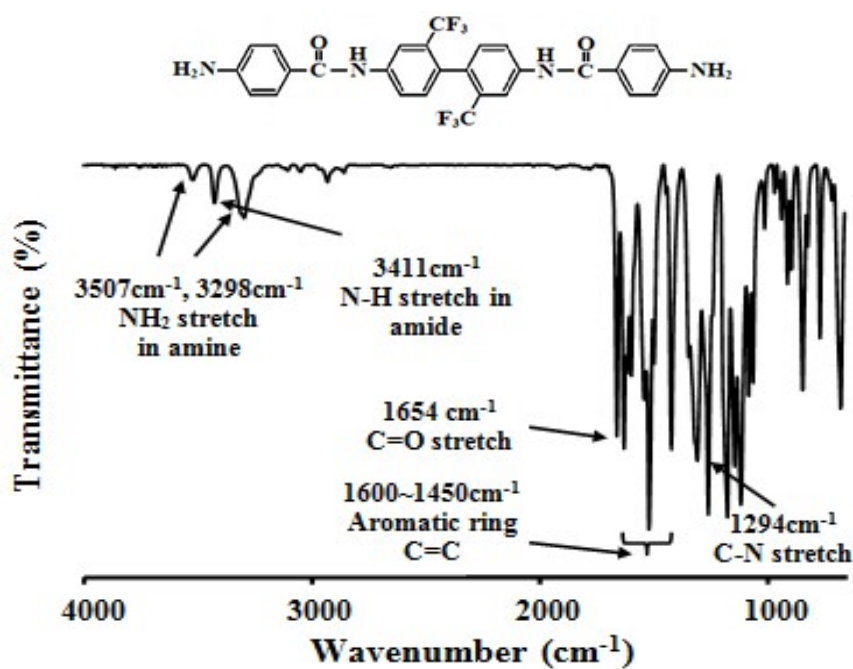

### $^1\text{H-NMR}$ of *m*-PMAB monomer

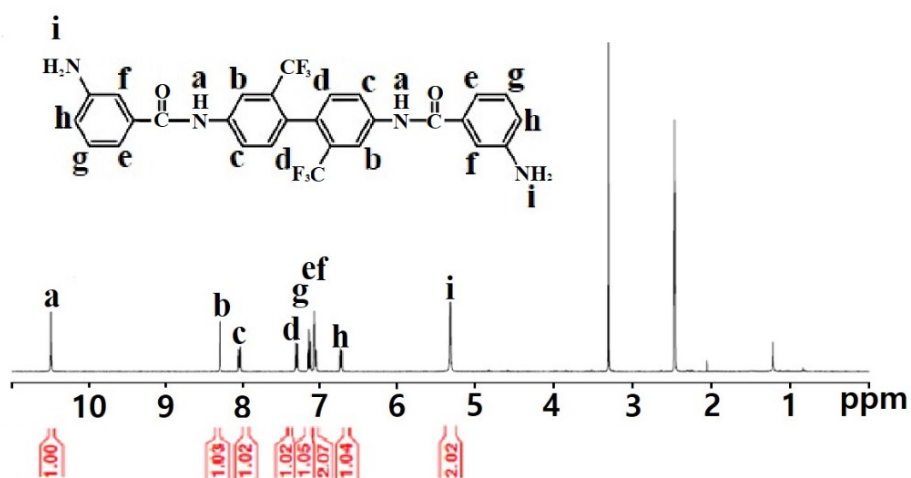

### $^1\text{H-NMR}$ of *p*-PMAB monomer

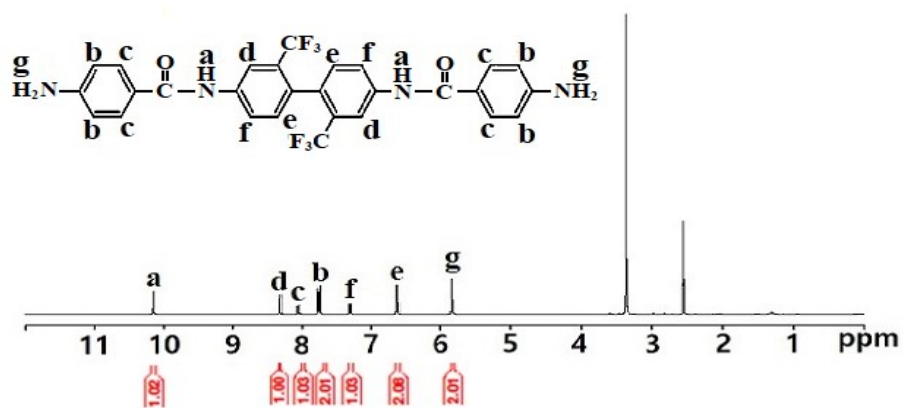

Supplement: d1ra03999g1.pdf [file d1ra03999g1.pdf]
